# Supplementary material for: Targeted Delivery of Mannosylated Nanoparticles Improve Prophylactic Efficacy of Immersion Vaccine against Fish Viral Disease
Source: Vaccines (Basel). 2020 Feb 15;8(1):87. doi: 10.3390/vaccines8010087 (PMC7157632; doi:10.3390/vaccines8010087)
Supplement: Supplementary file 1 [file vaccines-08-00087-s001.pdf]

# Targeted Delivery of Mannosylated Nanoparticles Improve Prophylactic Efficacy of Immersion Vaccine against Fish Viral Disease

**Table S1.** Primers used for the analysis of mRNA expression.

| Genes         | Accession no. |         | Primer Sequences (from 5' to 3') | Product Size (bp) |
|---------------|---------------|---------|----------------------------------|-------------------|
| 18S           | EU047719      | Forward | ATTTCCGACACGGAGAGG               | 90                |
|               |               | Reverse | CATGGGTTTAGGATACGCTC             |                   |
| MHC-I         | AY391782      | Forward | CCTGGCAGAAAAATGGACAAG            | 271               |
|               |               | Reverse | CCAACAACACCAATGACAATC            |                   |
| CD4           | KX033448.1    | Forward | GTGCAGAGCTGCACTGCGACA            | 240               |
|               |               | Reverse | GCACTATTTGCCTCCTTCAGA            |                   |
| MHC-II        | EF140725.1    | Forward | GAAGGAGAAATTACTCTA               | 138               |
|               |               | Reverse | TTTCTCTTGTGGATATTTGTAA           |                   |
| CD8           | GQ355586      | Forward | GAGTCTCTGCACGGATCTAT             | 172               |
|               |               | Reverse | GTGTAGTGTTCGAATTAAAGT            |                   |
| IL-1 $\beta$  | EU047716      | Forward | GGAGAATGTGATCGAAGAGCGT           | 448               |
|               |               | Reverse | GCTGATAAACCATCCGGGA              |                   |
| TNF- $\alpha$ | EU047718      | Forward | TGTGCCCGCGCTGTCTGCTTCACGCT       | 291               |
|               |               | Reverse | GATGAGGAAAGACACCTGGCTGTAGA       |                   |

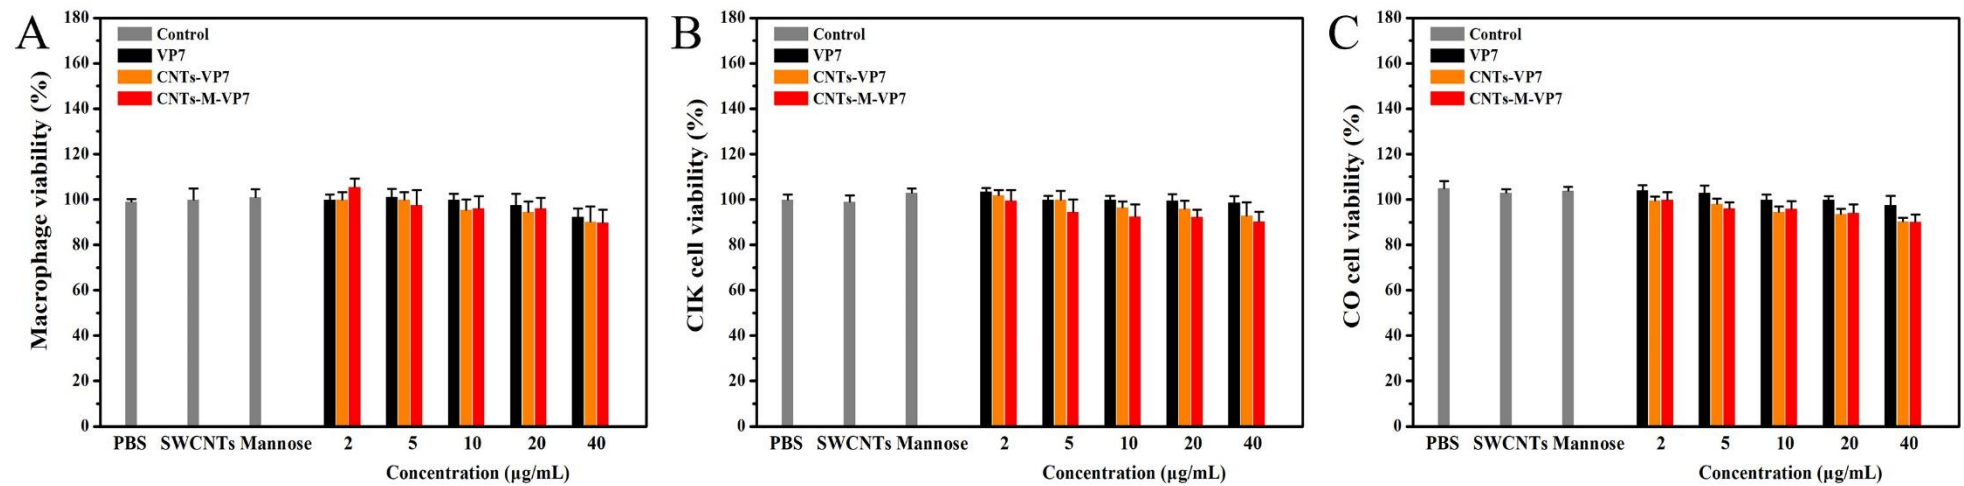

**Figure S1.** Safety evaluation of nanovaccine *in vitro*. Relative cell viability of (A) grass carp macrophage, CIK cells (B), and CO cells (C) after incubation with different concentrations of VP7, CNTs-VP7, and CNTs-M-VP7 for 24 h. Values are presented as mean  $\pm$  SD.

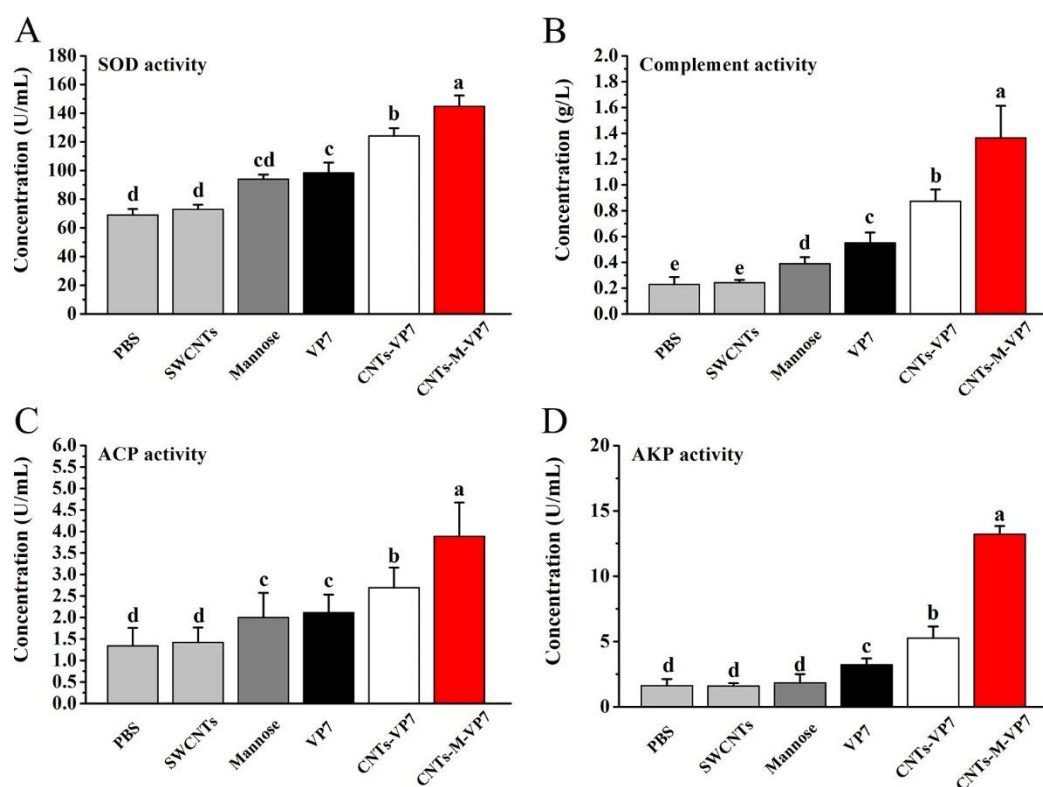

**Figure S2.** Enzyme activities in vaccinated grass carp: (A) Superoxide dismutase (SOD) activity; (B) Complement activity; (C) Acid phosphatase (ACP) activity; (D) Alkaline phosphatase (AKP) activity. Data are means for three assays and represented as mean  $\pm$  SD. *p* values were calculated by Duncan's test. Data at the same sampling time with different letters are significantly different ( $p < 0.05$ ).

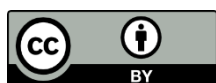

© 2020 by the authors. Submitted for possible open access publication under the terms and conditions of the Creative Commons Attribution (CC BY) license (<http://creativecommons.org/licenses/by/4.0/>).
